# Supplementary material for: Finite-Element Sea Ice Model (FESIM), version 2
Source: Copernicus journal article supplement (doi:10.5194/gmd-8-1747-2015), 2015-06-11
Supplement: Supplementary file 1 [file gmd-8-1747-2015-supplement.zip]

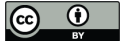

## *Supplement of*

# **Finite-Element Sea Ice Model (FESIM), version 2**

**S. Danilov et al.**

*Correspondence to:* S. Danilov ([sergey.danilov@awi.de](mailto:sergey.danilov@awi.de))

- gmd-8-1747-2015-supplement-cover-letter.pdf
- COPYRIGHT.txt
- Makefile
- \_\_MACOSX
  - .\_COPYRIGHT.txt
  - .\_Makefile
  - .\_feim.readme
  - .\_ice\_comm.F90
  - .\_ice\_evp.F90
  - .\_ice\_evp\_new.F90
  - .\_ice\_fct.F90
  - .\_ice\_init\_step.F90
  - .\_ice\_main.F90
  - .\_ice\_mesh.F90
  - .\_ice\_thermodynamics.F90
  - .\_ice\_vp.F90
  - .\_mesh2
  - mesh2
    - \* .\_elem2d.out
    - \* .\_nod2d.out
- feim.readme
- ice\_comm.F90
- ice\_evp.F90
- ice\_evp\_new.F90

- ice\_fct.F90
- ice\_init\_step.F90
- ice\_main.F90
- ice\_mesh.F90
- ice\_thermodynamics.F90
- ice\_vp.F90
- mesh2
  - elem2d.out
  - nod2d.out

The copyright of individual parts of the supplement might differ from the CC-BY 3.0 licence.
